# Supplementary material for: Effect of Escin Alone or in Combination with Antifungal Agents on Resistant Candida glabrata Biofilms: Mechanisms of Action
Source: MDPI journal article supplement (doi:10.3390/antibiotics12071210), 2023-07-20
Supplement: s1 [file s1]

**Table S1.** Gene-specific primers used for real-time RT-PCR.

| Gene name                             | Acronym      | Primer name        | Sequence (5'→3')         | TM (°C) | Amplicon Length (bp) | Reference |
|---------------------------------------|--------------|--------------------|--------------------------|---------|----------------------|-----------|
| <i>Actin</i>                          | <i>actin</i> | C.glabrata_actin_F | TTGCCACACGCTATTTTGAG     | 57.01   | 225 bp               | [1]       |
|                                       |              | C.glabrata_actin_R | ACCATCTGGCAATTCGTAGG     | 57.67   |                      |           |
| <i>Ergosterol biosynthesis enzyme</i> | <i>ERG11</i> | C.glabrata_ERG11_F | ATTGGTGTCTTGATGGGTGGTC   | 60.56   | 92 bp                | [2]       |
|                                       |              | C.glabrata_ERG11_R | TCTTCTTGGACATCTGGTCTTTCA | 59.65   |                      |           |
| <i>Agglutinin like-sequence 3</i>     | <i>ALS3</i>  | C.glabrata_ALS3_F  | CTGGACCACCAGGAAACACT     | 59.53   | 226 bp               | [3]       |
|                                       |              | C.glabrata_ALS3_R  | GGTGGAGCGGTGACAGTAGT     | 61.53   |                      |           |
| <i>Genes encoding efflux pumps</i>    | <i>CDR1</i>  | C.glabrata_CDR1_F  | TAGCACATCAACTACACGAACGT  | 60.30   | 148 bp               | [2]       |
|                                       |              | C.glabrata_CDR1_R  | AGAGTGAACATTAAGGATGCCATG | 59.11   |                      |           |
| <i>High-osmolarity glycerol1</i>      | <i>HOG1</i>  | C.glabrata_HOG1_F  | GACTTGTGGTCTGTGGGTTG     | 58.69   | 125 bp               | [4]       |
|                                       |              | C.glabrata_HOG1_R  | ACATCAGCAGGAGGTGAGC      | 59.40   |                      |           |

**References**

- [1] A. Cortegiani, G. Misseri, T. Fasciana *et al.*, "Epidemiology, clinical characteristics, resistance, and treatment of infections by *Candida auris*," *J Intensive Care*, vol. 6, pp. 69, 2018.
- [2] S. G. Whaley, E. L. Berkow, J. M. Rybak *et al.*, "Azole antifungal resistance in *Candida albicans* and emerging non-*albicans* *Candida* species," *Frontiers in microbiology*, vol. 7, pp. 2173, 2017.
- [3] M. C. Leite de Andrade, M. A. Soares de Oliveira, F. d. A. G. d. Santos *et al.*, "A new approach by optical coherence tomography for elucidating biofilm formation by emergent *Candida* species," *PLoS One*, vol. 12, no. 11, pp. e0188020, 2017.
- [4] R. Rajendran, L. Sherry, C. J. Nile *et al.*, "Biofilm formation is a risk factor for mortality in patients with *Candida albicans* bloodstream infection—Scotland, 2012–2013," *Clinical Microbiology and Infection*, vol. 22, no. 1, pp. 87–93, 2016.
